# Supplementary material for: REVersal of nEuromusculAr bLocking Agents in Patients Undergoing General Anaesthesia (REVEAL Study)
Source: MDPI journal article supplement (doi:10.3390/jcm12020563), 2023-01-10
Supplement: s1 [file s1]

### Figure S1: (a) Missing data and random-forest-based imputation

This heatmap reports frequency of missing data, stratified by the primary outcome (type of NMBA reversal)

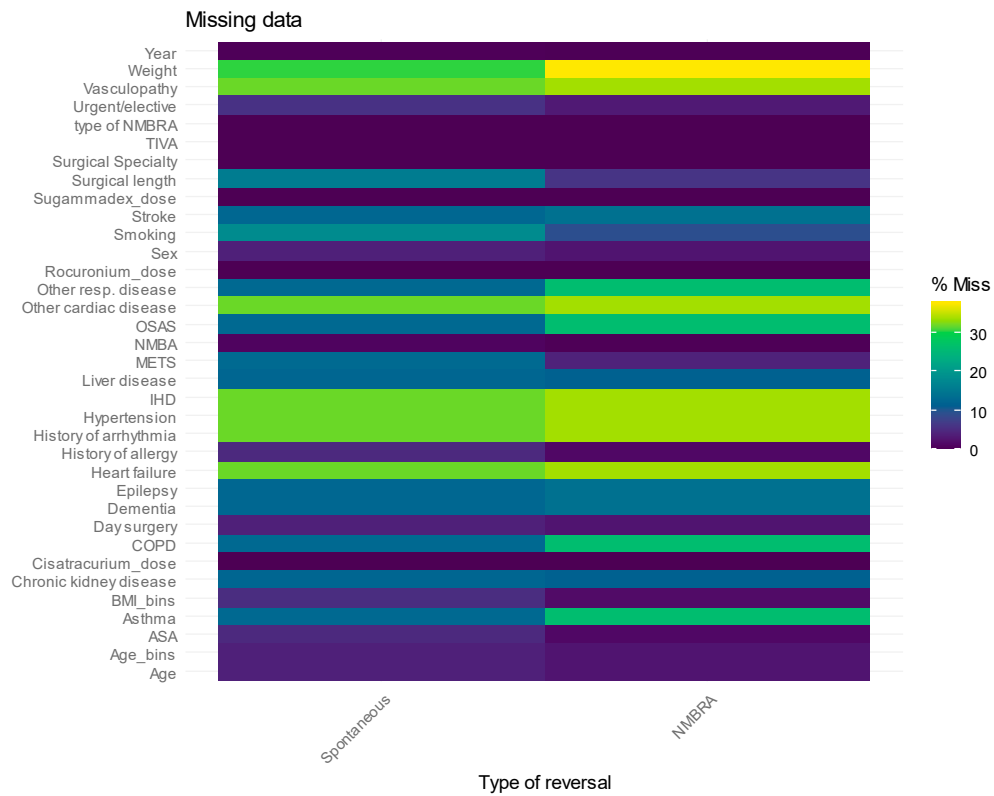

## Figure S1 (b) Random forest performance

The following multiple plots report the results of random-forest-based imputation, with distribution of imputed data (light blue) compared to the original data (red)

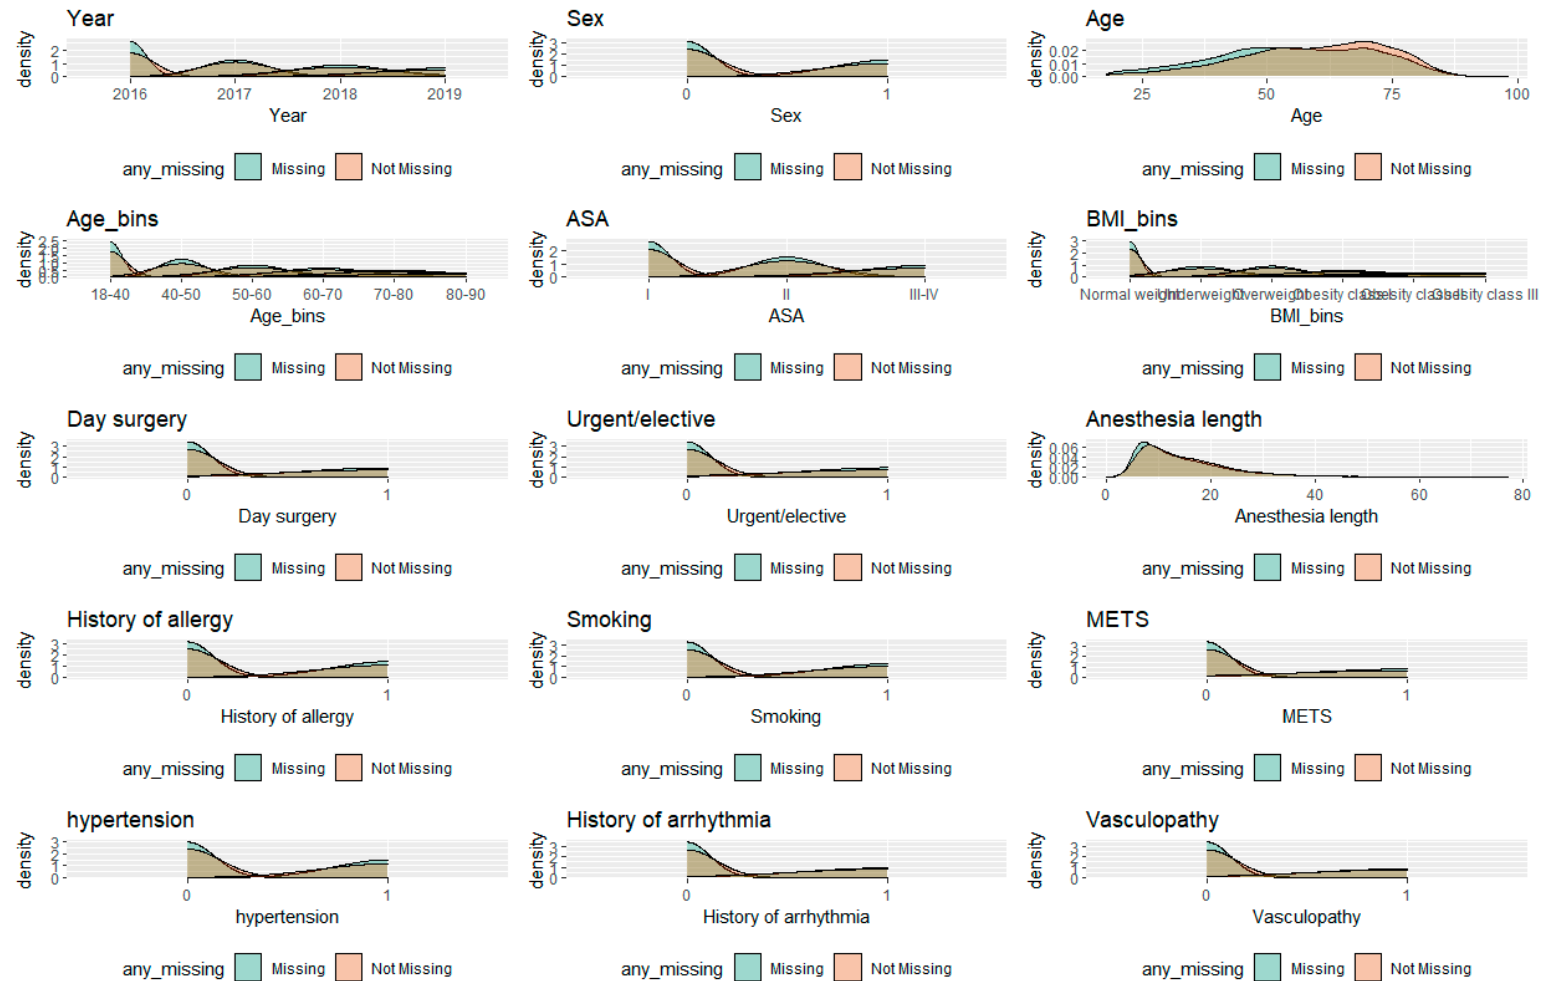

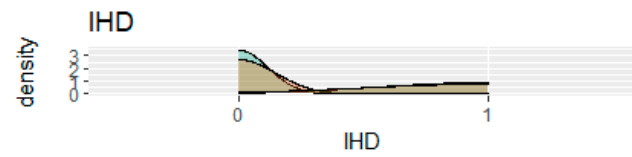

any\_missing Missing Not Missing

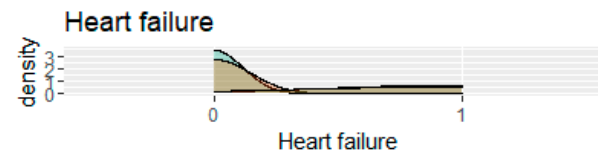

any\_missing Missing Not Missing

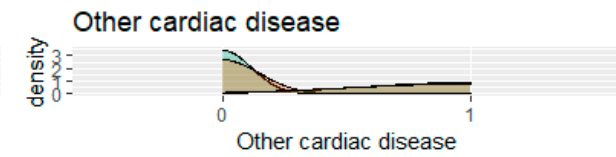

any\_missing Missing Not Missing

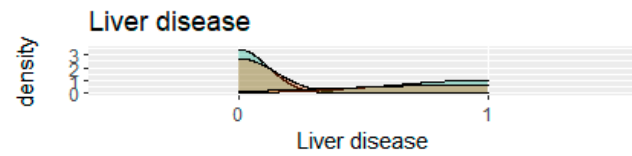

any\_missing Missing Not Missing

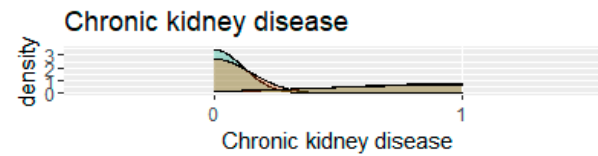

any\_missing Missing Not Missing

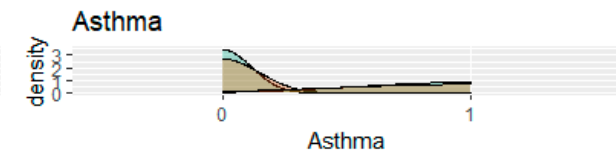

any\_missing Missing Not Missing

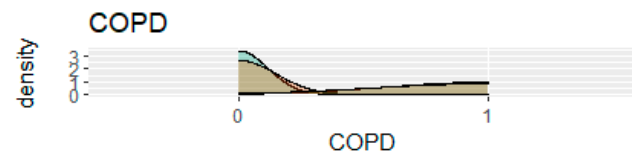

any\_missing Missing Not Missing

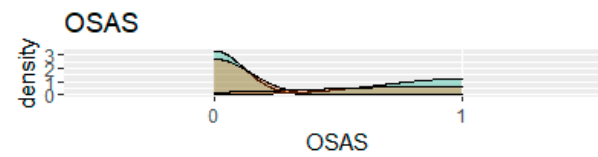

any\_missing Missing Not Missing

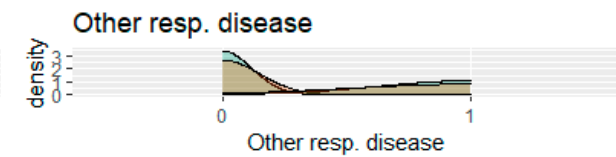

any\_missing Missing Not Missing

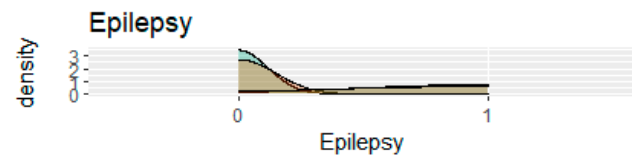

any\_missing Missing Not Missing

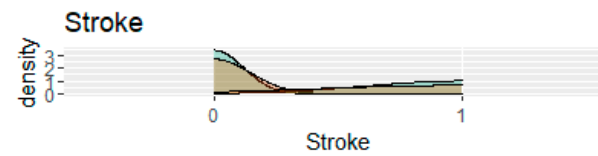

any\_missing Missing Not Missing

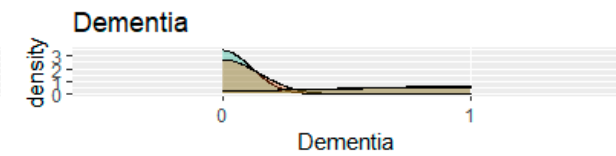

any\_missing Missing Not Missing

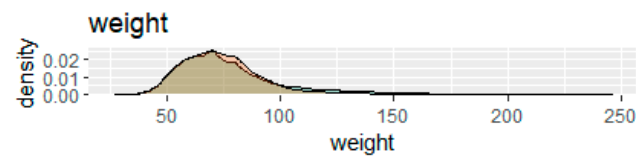

any\_missing Missing Not Missing

**Figure S2: sensitivity analysis including non-missing data only**

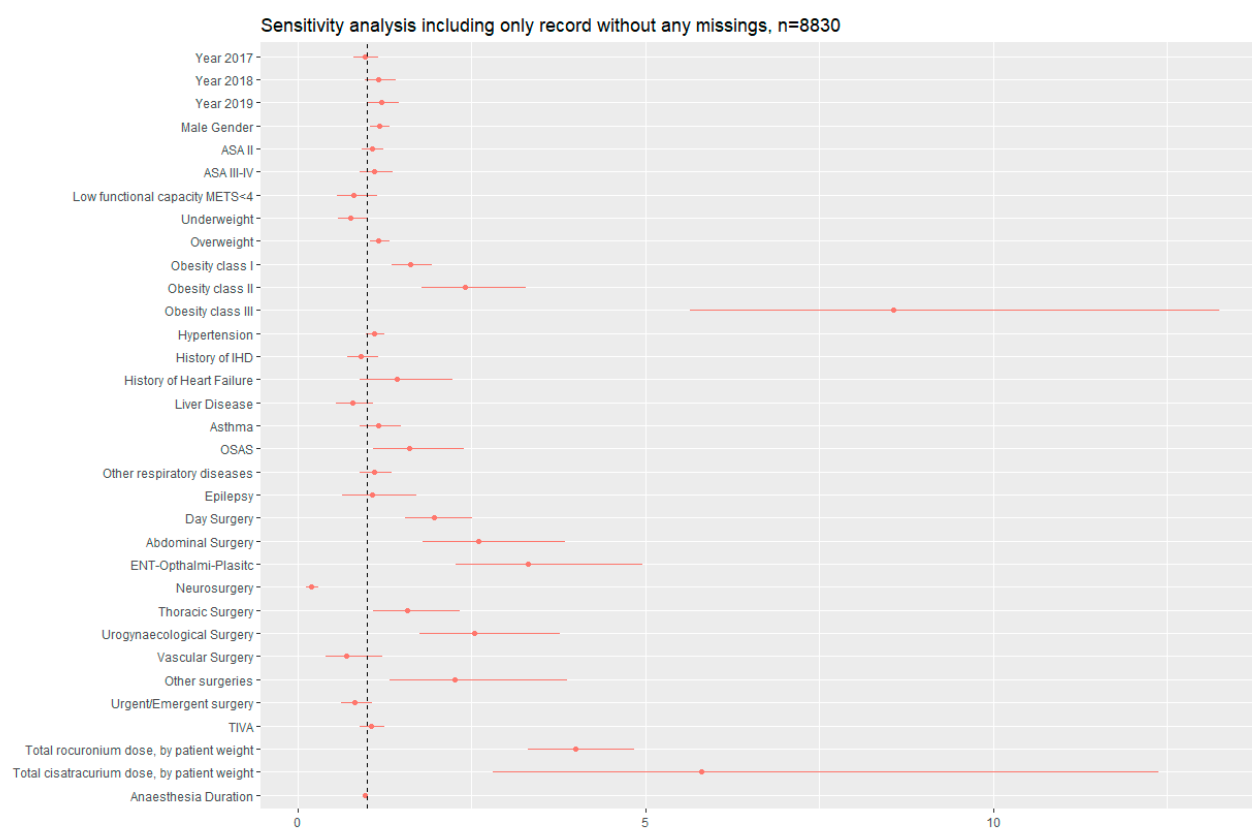

**Table S1: Multivariable analysis on factors associated with sugammadex reversal in the subpopulation of patients paralyzed with rocuronium**

| Characteristic                            | OR <sup>1</sup> | 95% CI <sup>1</sup> | p-value |
|-------------------------------------------|-----------------|---------------------|---------|
| Year (vs. 2016)                           |                 |                     |         |
| 2017                                      | 1.16            | 1.05-1.29           | 0.004   |
| 2018                                      | 1.49            | 1.36-1.65           | <0.001  |
| 2019                                      | 1.47            | 1.34-1.62           | <0.001  |
| ASA (vs. class I)                         |                 |                     |         |
| Class II                                  | 1.04            | 0.97-1.12           | 0.3     |
| Class III-IV                              | 1.53            | 1.38-1.71           | <0.001  |
| Low functional capacity (METS<4)          | 0.60            | 0.49-0.74           | <0.001  |
| BMI class (vs. normal weight)             |                 |                     |         |
| Underweight (<18.5)                       | 0.87            | 0.75-1.00           | 0.05    |
| Overweight (25-29.9)                      | 1.16            | 1.08-1.24           | <0.001  |
| Obesity class I (30-34.9)                 | 1.53            | 1.38-1.70           | <0.001  |
| Obesity class II (35-39.9)                | 3.52            | 3.01-4.13           | <0.001  |
| Obesity class III (>40)                   | 11.8            | 9.77-14.3           | <0.001  |
| Day Surgery                               | 1.25            | 1.11-1.40           | <0.001  |
| Type of surgery                           |                 |                     |         |
| Orthopaedic surgery (ref)                 | —               | —                   |         |
| Abdominal surgery                         | 3.49            | 2.91-4.22           | <0.001  |
| ENT- Ophthalmic -Plastic surgery          | 2.98            | 2.47-3.60           | <0.001  |
| Neurosurgery                              | 0.12            | 0.10-0.15           | <0.001  |
| Thoracic surgery                          | 1.75            | 1.45-2.11           | <0.001  |
| Urogynaecology surgery                    | 2.67            | 2.21-3.25           | <0.001  |
| Vascular surgery                          | 0.60            | 0.44-0.82           | 0.001   |
| Other surgeries                           | 2.23            | 1.77-2.84           | <0.001  |
| Urgent\Emergent surgery                   | 0.63            | 0.54-0.73           | <0.001  |
| TIVA                                      | 0.93            | 0.86-1.01           | 0.077   |
| Total rocuronium dose (on patient weight) | 3.56            | 3.19-3.98           | <0.001  |

|                                          |      |           |        |
|------------------------------------------|------|-----------|--------|
| Anaesthesia length (per 10-min increase) | 0.95 | 0.94-0.95 | <0.001 |
| Allergy                                  | 0.95 | 0.89-1.01 | 0.11   |
| Hypertension                             | 1.08 | 1.02-1.15 | 0.013  |
| History of heart failure                 | 0.77 | 0.58-1.01 | 0.06   |
| Liver disease                            | 0.89 | 0.79-1.00 | 0.052  |
| Asthma                                   | 1.24 | 1.07-1.44 | 0.005  |
| OSAS                                     | 1.17 | 1.07-1.29 | <0.001 |
| Other respiratory comorbidities          | 1.15 | 1.02-1.30 | 0.025  |
| Epilepsy                                 | 0.69 | 0.51-0.94 | 0.022  |

\*TIVA=total intravenous anaesthesia, OSAS=Obstructive Sleep Apnoea Syndrome, IHD=Ischemic Heart Disease, MET=Metabolic equivalent of tasks

Figure S3: Forest plot multivariable regression of sugammadex vs neostigmine reversal in the subpopulation of patients paralyzed with rocuronium

#### Factors associated with use of sugammadex

sensitivity analysis including only patients treated with rocuronium

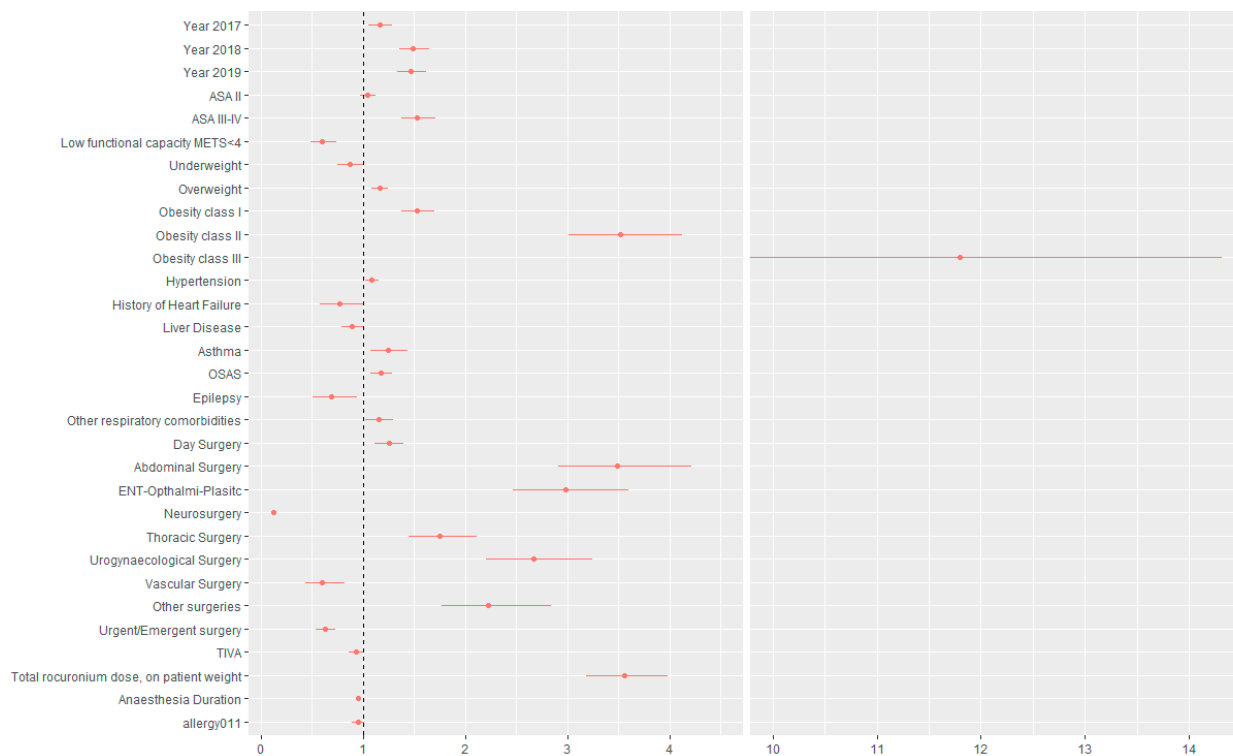

**Figure S4**

Total number of cases included (blue) by surgical specialty, and percent use of NMBA reversals in 2016 (light orange) vs. 2019 (dark orange),

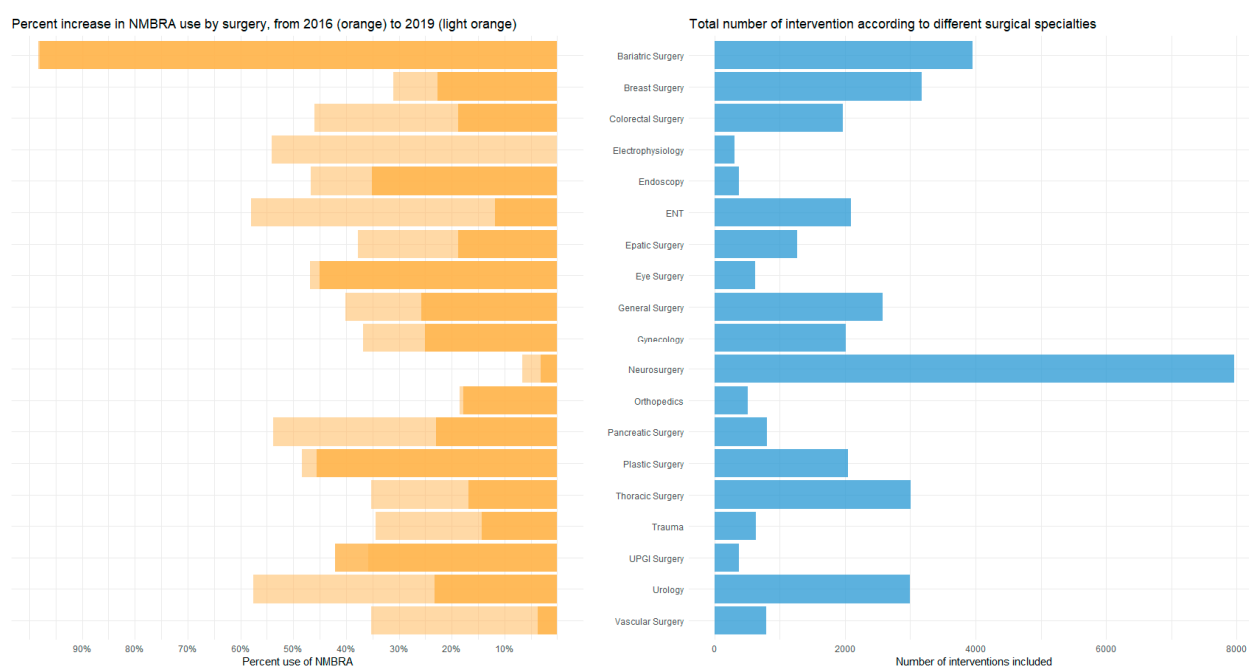

**Figure S5** Performance analysis of the two regression models

|                                              | ROC  | Sensibility | Specificity |
|----------------------------------------------|------|-------------|-------------|
| NMBRA vs spontaneous reversal                | 0.82 | 0.90        | 0.49        |
| Sugammadex reversal in rocuronium population | 0.84 | 0.91        | 0.51        |



NMBRA vs spontaneous reversal model

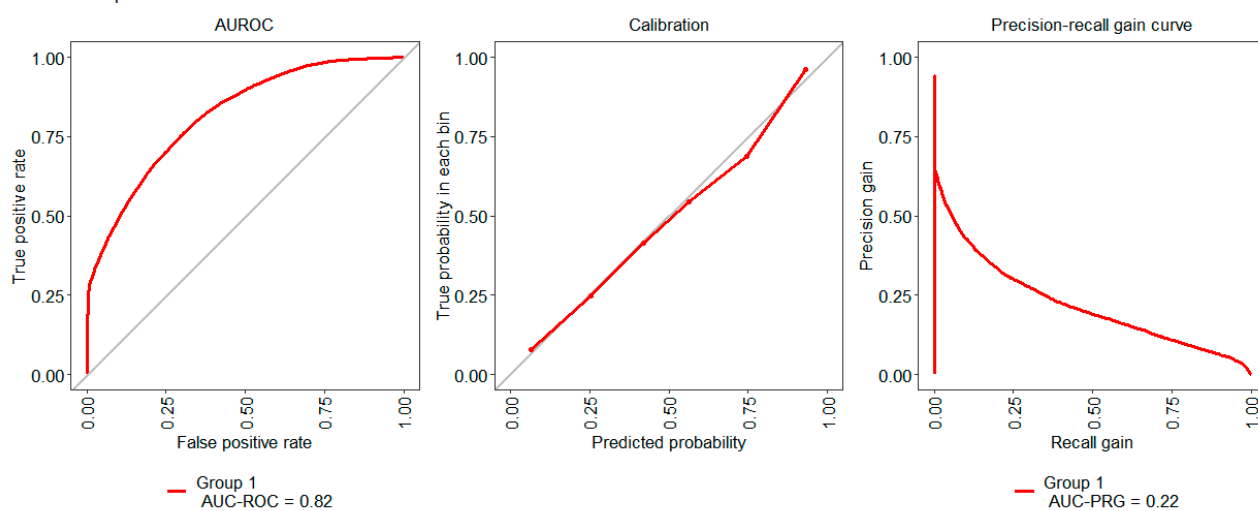

Sugammadex reversal in rocuronium population

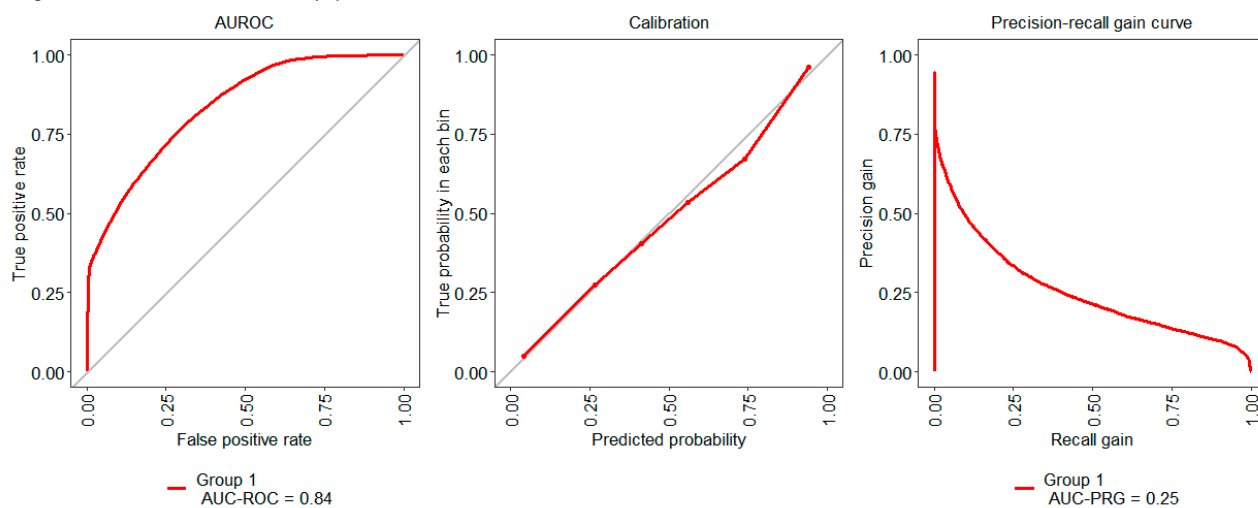

**Table S2:** time trends in NMBA reversals in patients paralyzed with rocuronium

|                                  | 2016        |              |              | 2017        |              |              | 2018        |              |              | 2019        |              |              |
|----------------------------------|-------------|--------------|--------------|-------------|--------------|--------------|-------------|--------------|--------------|-------------|--------------|--------------|
|                                  | Neostigmine | Sugammadex   | Neither      |
| N of surgeries                   | 127 (2.6%)  | 1484 (30.4%) | 3270 (67.0%) | 157 (2.2%)  | 2389 (33.5%) | 4575 (64.2%) | 137 (1.5%)  | 3465 (38.4%) | 5411 (60.0%) | 310 (3.2%)  | 3967 (40.5%) | 5520 (56.3%) |
| Age                              | 54.9 (16.1) | 48 (14.9)    | 56.4 (14.8)  | 55.9 (16.7) | 50.7 (15.4)  | 56.9 (15.3)  | 58.4 (16.2) | 53.1 (16.1)  | 57.2 (15.4)  | 59.2 (14.4) | 52.9 (16.1)  | 57.2 (15.4)  |
| Gender (male)                    | 59 (3.4%)   | 400 (22.8%)  | 1299 (73.9%) | 85 (3.1%)   | 738 (26.7%)  | 1942 (70.2%) | 74 (1.9%)   | 1337 (34.8%) | 2429 (63.3%) | 165 (3.8%)  | 1714 (39.9%) | 2417 (56.3%) |
| Age bins:18-40                   | 22 (2.4%)   | 431 (47.8%)  | 448 (49.7%)  | 29 (2.3%)   | 589 (46.1%)  | 661 (51.7%)  | 22 (1.4%)   | 793 (49.2%)  | 798 (49.5%)  | 35 (2.0%)   | 934 (52.6%)  | 807 (45.4%)  |
| 40-50                            | 23 (2.2%)   | 392 (37.4%)  | 632 (60.4%)  | 25 (1.7%)   | 615 (41.4%)  | 844 (56.9%)  | 21 (1.2%)   | 745 (43.5%)  | 947 (55.3%)  | 47 (2.5%)   | 825 (43.5%)  | 1023 (54.0%) |
| 50-60                            | 17 (1.8%)   | 276 (30.0%)  | 627 (68.2%)  | 29 (2.0%)   | 488 (34.2%)  | 911 (63.8%)  | 24 (1.2%)   | 732 (36.9%)  | 1226 (61.9%) | 63 (3.0%)   | 857 (40.3%)  | 1204 (56.7%) |
| 60-70                            | 26 (3.0%)   | 157 (18.4%)  | 670 (78.5%)  | 30 (2.2%)   | 318 (23.2%)  | 1024 (74.6%) | 27 (1.5%)   | 604 (33.3%)  | 1182 (65.2%) | 91 (4.6%)   | 688 (34.9%)  | 1194 (60.5%) |
| 70-80                            | 20 (3.2%)   | 94 (15.2%)   | 506 (81.6%)  | 34 (3.2%)   | 222 (21.1%)  | 794 (75.6%)  | 36 (2.4%)   | 455 (30.7%)  | 989 (66.8%)  | 59 (3.8%)   | 504 (32.1%)  | 1008 (64.2%) |
| >80                              | 1 (0.9%)    | 27 (23.5%)   | 87 (75.7%)   | 3 (1.4%)    | 63 (29.7%)   | 146 (68.9%)  | 5 (1.4%)    | 116 (33.0%)  | 231 (65.6%)  | 10 (2.6%)   | 134 (35.3%)  | 236 (62.1%)  |
| ASA Class: ASA I                 | 34 (2.9%)   | 253 (21.4%)  | 897 (75.8%)  | 49 (2.5%)   | 498 (25.3%)  | 1419 (72.2%) | 42 (1.7%)   | 737 (30.2%)  | 1665 (68.1%) | 79 (3.1%)   | 804 (31.3%)  | 1683 (65.6%) |
| ASA II                           | 59 (3.0%)   | 477 (23.9%)  | 1458 (73.1%) | 78 (2.5%)   | 843 (27.5%)  | 2148 (70.0%) | 74 (1.8%)   | 1415 (34.9%) | 2571 (63.3%) | 186 (4.1%)  | 1505 (33.3%) | 2823 (62.5%) |
| ASA III                          | 17 (1.5%)   | 738 (66.6%)  | 353 (31.9%)  | 26 (1.4%)   | 1026 (53.8%) | 856 (44.9%)  | 20 (0.9%)   | 1266 (54.0%) | 1060 (45.2%) | 36 (1.4%)   | 1580 (62.9%) | 894 (35.6%)  |
| ASA IV                           | 0 (0.0%)    | 0 (0.0%)     | 5 (100.0%)   | 0 (0.0%)    | 6 (18.8%)    | 26 (81.2%)   | 0 (0.0%)    | 5 (19.2%)    | 21 (80.8%)   | 0 (0.0%)    | 21 (65.6%)   | 11 (34.4%)   |
| BMI Category Underweight         | 0 (0.0%)    | 44 (35.2%)   | 81 (64.8%)   | 1 (0.4%)    | 84 (29.9%)   | 196 (69.8%)  | 6 (1.7%)    | 130 (37.2%)  | 213 (61.0%)  | 6 (1.8%)    | 108 (31.9%)  | 225 (66.4%)  |
| Normal weight                    | 56 (3.3%)   | 367 (21.5%)  | 1281 (75.2%) | 71 (2.5%)   | 733 (25.3%)  | 2089 (72.2%) | 64 (1.7%)   | 1224 (32.1%) | 2525 (66.2%) | 154 (3.8%)  | 1334 (32.9%) | 2567 (63.3%) |
| Overweight                       | 39 (3.2%)   | 238 (19.5%)  | 943 (77.3%)  | 55 (2.7%)   | 466 (22.7%)  | 1532 (74.6%) | 48 (1.8%)   | 785 (29.7%)  | 1806 (68.4%) | 99 (3.4%)   | 895 (31.1%)  | 1883 (65.5%) |
| Obesity class I                  | 12 (3.0%)   | 99 (24.6%)   | 291 (72.4%)  | 22 (3.4%)   | 182 (27.8%)  | 451 (68.9%)  | 12 (1.4%)   | 268 (31.8%)  | 564 (66.8%)  | 31 (3.5%)   | 308 (35.2%)  | 537 (61.3%)  |
| Obesity class II                 | 3 (1.2%)    | 161 (66.0%)  | 80 (32.8%)   | 2 (0.6%)    | 240 (67.8%)  | 112 (31.6%)  | 5 (1.3%)    | 258 (66.0%)  | 128 (32.7%)  | 8 (1.8%)    | 322 (72.4%)  | 115 (25.8%)  |
| Obesity class III                | 0 (0.0%)    | 557 (94.7%)  | 31 (5.3%)    | 2 (0.3%)    | 661 (92.7%)  | 50 (7.0%)    | 1 (0.1%)    | 744 (92.5%)  | 59 (7.3%)    | 1 (0.1%)    | 932 (94.7%)  | 51 (5.2%)    |
| Comorbidities History of allergy | 29 (2.0%)   | 545 (36.8%)  | 907 (61.2%)  | 52 (2.2%)   | 848 (35.4%)  | 1494 (62.4%) | 41 (1.3%)   | 1207 (39.6%) | 1799 (59.0%) | 111 (3.5%)  | 1334 (41.8%) | 1745 (54.7%) |
| Smoking                          | 24 (2.4%)   | 369 (36.4%)  | 622 (61.3%)  | 32 (2.0%)   | 589 (36.1%)  | 1012 (62.0%) | 36 (1.8%)   | 812 (39.9%)  | 1186 (58.3%) | 56 (2.6%)   | 943 (43.6%)  | 1165 (53.8%) |
| Hypertension                     | 37 (2.8%)   | 427 (32.6%)  | 846 (64.6%)  | 50 (2.2%)   | 724 (32.3%)  | 1470 (65.5%) | 42 (1.5%)   | 1061 (37.1%) | 1756 (61.4%) | 108 (3.5%)  | 1236 (40.2%) | 1729 (56.3%) |
| METS<4                           | 0 (0.0%)    | 20 (29.4%)   | 48 (70.6%)   | 7 (3.2%)    | 44 (20.0%)   | 169 (76.8%)  | 4 (2.2%)    | 54 (29.0%)   | 128 (68.8%)  | 13 (6.9%)   | 79 (41.8%)   | 97 (51.3%)   |
| Ischemic heart disease           | 3 (1.9%)    | 33 (21.0%)   | 121 (77.1%)  | 7 (2.4%)    | 80 (27.1%)   | 208 (70.5%)  | 12 (3.0%)   | 116 (29.0%)  | 272 (68.0%)  | 11 (3.0%)   | 147 (40.6%)  | 204 (56.4%)  |
| History of arrhythmic disease    | 3 (1.9%)    | 37 (23.7%)   | 116 (74.4%)  | 5 (1.4%)    | 97 (27.2%)   | 255 (71.4%)  | 8 (1.6%)    | 159 (31.4%)  | 339 (67.0%)  | 16 (3.0%)   | 195 (36.3%)  | 326 (60.7%)  |

|                            |            |              |              |             |              |              |               |               |               |               |               |              |
|----------------------------|------------|--------------|--------------|-------------|--------------|--------------|---------------|---------------|---------------|---------------|---------------|--------------|
| Vasculopathy               | 4 (5.6%)   | 19 (26.4%)   | 49 (68.1%)   | 2 (0.9%)    | 48 (22.2%)   | 166 (76.9%)  | 7 (2.2%)      | 70 (22.2%)    | 238 (75.6%)   | 8 (2.3%)      | 107 (30.4%)   | 237 (67.3%)  |
| Heart failure              | 2 (5.7%)   | 15 (42.9%)   | 18 (51.4%)   | 1 (1.4%)    | 16 (22.2%)   | 55 (76.4%)   | 3 (2.5%)      | 47 (39.5%)    | 69 (58.0%)    | 3 (2.7%)      | 47 (42.0%)    | 62 (55.4%)   |
| Other (Cardiac)            | 4 (2.3%)   | 66 (38.6%)   | 101 (59.1%)  | 8 (3.1%)    | 99 (38.8%)   | 148 (58.0%)  | 8 (1.8%)      | 152 (33.5%)   | 294 (64.8%)   | 19 (3.6%)     | 208 (39.1%)   | 305 (57.3%)  |
| Asthma                     | 2 (1.1%)   | 91 (50.8%)   | 86 (48.0%)   | 10 (4.4%)   | 107 (47.1%)  | 110 (48.5%)  | 5 (1.5%)      | 170 (50.6%)   | 161 (47.9%)   | 14 (3.6%)     | 178 (45.9%)   | 196 (50.5%)  |
| COPD                       | 7 (3.1%)   | 76 (33.6%)   | 143 (63.3%)  | 13 (2.8%)   | 119 (25.5%)  | 335 (71.7%)  | 13 (2.1%)     | 215 (35.1%)   | 385 (62.8%)   | 20 (3.0%)     | 228 (34.5%)   | 413 (62.5%)  |
| OSAS                       | 3 (2.2%)   | 109 (79.0%)  | 26 (18.8%)   | 2 (1.1%)    | 139 (76.4%)  | 41 (22.5%)   | 1 (0.4%)      | 170 (70.2%)   | 71 (29.3%)    | 3 (1.0%)      | 221 (73.9%)   | 75 (25.1%)   |
| Other (Respiratory)        | 2 (0.7%)   | 167 (55.9%)  | 130 (43.5%)  | 2 (0.4%)    | 253 (55.1%)  | 204 (44.4%)  | 6 (0.9%)      | 324 (50.9%)   | 306 (48.1%)   | 15 (1.8%)     | 534 (62.5%)   | 306 (35.8%)  |
| Renal failure              | 2 (4.3%)   | 12 (25.5%)   | 33 (70.2%)   | 3 (2.5%)    | 34 (28.1%)   | 84 (69.4%)   | 6 (3.0%)      | 68 (34.2%)    | 125 (62.8%)   | 8 (4.3%)      | 67 (35.6%)    | 113 (60.1%)  |
| Liver disease              | 1 (2.0%)   | 12 (24.0%)   | 37 (74.0%)   | 5 (3.1%)    | 34 (20.9%)   | 124 (76.1%)  | 2 (1.0%)      | 37 (18.4%)    | 162 (80.6%)   | 5 (2.0%)      | 73 (28.6%)    | 177 (69.4%)  |
| Epilepsy                   | 1 (1.2%)   | 14 (16.9%)   | 68 (81.9%)   | 0 (0.0%)    | 21 (16.8%)   | 104 (83.2%)  | 1 (0.7%)      | 23 (16.2%)    | 118 (83.1%)   | 4 (3.2%)      | 22 (17.6%)    | 99 (79.2%)   |
| Stroke                     | 2 (2.4%)   | 26 (31.0%)   | 56 (66.7%)   | 6 (3.6%)    | 50 (29.9%)   | 111 (66.5%)  | 6 (3.7%)      | 48 (29.4%)    | 109 (66.9%)   | 6 (3.2%)      | 69 (36.7%)    | 113 (60.1%)  |
| Dementia                   | 5 (27.8%)  | 13 (72.2%)   | 18 (100.0%)  | 0 (0.0%)    | 7 (16.3%)    | 36 (83.7%)   | 1 (2.0%)      | 17 (33.3%)    | 33 (64.7%)    | 3 (6.0%)      | 13 (26.0%)    | 34 (68.0%)   |
| Inpatients                 | 101 (2.3%) | 1304 (30.3%) | 2898 (67.3%) | 124 (1.9%)  | 2157 (32.9%) | 4269 (65.2%) | 99 (1.2%)     | 3197 (37.8%)  | 5170 (61.1%)  | 276 (3.0%)    | 3672 (40.2%)  | 5188 (56.8%) |
| Day Surgery                | 8 (5.2%)   | 73 (47.7%)   | 72 (47.1%)   | 26 (9.5%)   | 138 (50.2%)  | 111 (40.4%)  | 36 (7.4%)     | 248 (50.9%)   | 203 (41.7%)   | 29 (5.0%)     | 270 (46.3%)   | 284 (48.7%)  |
| Abdominal Surgery          | 10 (0.8%)  | 956 (74.1%)  | 325 (25.2%)  | 16 (0.8%)   | 1291 (63.3%) | 731 (35.9%)  | 16 (0.6%)     | 1559 (61.0%)  | 979 (38.3%)   | 75 (2.7%)     | 1825 (64.8%)  | 916 (32.5%)  |
| ENT-Ophthalmic- Plastic    | 43 (6.7%)  | 242 (37.9%)  | 353 (55.3%)  | 44 (5.6%)   | 304 (38.7%)  | 437 (55.7%)  | 52 (4.1%)     | 629 (49.2%)   | 597 (46.7%)   | 35 (2.1%)     | 847 (51.7%)   | 755 (46.1%)  |
| Neurosurgery               | 44 (2.5%)  | 6 (0.3%)     | 1679 (97.1%) | 45 (2.4%)   | 26 (1.4%)    | 1792 (96.2%) | 11 (0.5%)     | 68 (3.4%)     | 1935 (96.1%)  | 13 (0.6%)     | 119 (5.9%)    | 1891 (93.5%) |
| Orthopaedic                | 6 (4.8%)   | 21 (16.7%)   | 99 (78.6%)   | 18 (7.8%)   | 34 (14.7%)   | 180 (77.6%)  | 12 (5.2%)     | 54 (23.3%)    | 166 (71.6%)   | 11 (4.4%)     | 60 (24.1%)    | 178 (71.5%)  |
| Other                      | 0 (0.0%)   | 20 (27.4%)   | 53 (72.6%)   | 3 (1.8%)    | 73 (44.8%)   | 87 (53.4%)   | 1 (0.5%)      | 91 (46.0%)    | 106 (53.5%)   | 12 (3.9%)     | 121 (39.3%)   | 175 (56.8%)  |
| Thoracic                   | 10 (1.4%)  | 162 (22.3%)  | 556 (76.4%)  | 15 (1.3%)   | 402 (34.9%)  | 736 (63.8%)  | 25 (1.7%)     | 544 (36.1%)   | 940 (62.3%)   | 62 (4.1%)     | 486 (32.1%)   | 967 (63.8%)  |
| Urogynaecology             | 12 (4.6%)  | 74 (28.6%)   | 173 (66.8%)  | 16 (2.2%)   | 244 (33.3%)  | 473 (64.5%)  | 9 (0.9%)      | 497 (47.0%)   | 551 (52.1%)   | 97 (8.6%)     | 471 (41.8%)   | 559 (49.6%)  |
| Vascular                   | 2 (5.4%)   | 3 (8.1%)     | 32 (86.5%)   | 0 (0.0%)    | 15 (9.7%)    | 139 (90.3%)  | 11 (6.4%)     | 23 (13.5%)    | 137 (80.1%)   | 5 (4.1%)      | 38 (31.1%)    | 79 (64.8%)   |
| Elective                   | 102 (2.5%) | 1418 (34.5%) | 2590 (63.0%) | 145 (2.2%)  | 2249 (34.3%) | 4169 (63.5%) | 132 (1.6%)    | 3245 (38.5%)  | 5046 (59.9%)  | 279 (3.0%)    | 3719 (40.5%)  | 5178 (56.4%) |
| Urgent\emergent            | 7 (6.0%)   | 23 (19.7%)   | 87 (74.4%)   | 5 (1.7%)    | 61 (20.7%)   | 228 (77.6%)  | 3 (0.8%)      | 116 (32.8%)   | 235 (66.4%)   | 19 (5.6%)     | 121 (35.9%)   | 197 (58.5%)  |
| TIVA                       | 50 (5.7%)  | 214 (24.5%)  | 611 (69.8%)  | 58 (5.7%)   | 282 (27.8%)  | 674 (66.5%)  | 63 (4.4%)     | 419 (29.1%)   | 960 (66.6%)   | 72 (4.7%)     | 409 (27.0%)   | 1036 (68.3%) |
| Median dose pro kg (mg)    | 23±0.7 u   | 1.98 ±0.8 mg | -            | 21±0.8 u    | 1.98±0.8 mg  | -            | 25±1.2 u      | 2.24 (1.0)    | -             | 0.25±0.9 u    | 2.26 (1.0)    | -            |
| Inhaled anaesthesia        | 77 (1.9%)  | 1270 (31.7%) | 2659 (66.4%) | 99 (1.6%)   | 2107 (34.5%) | 3901 (63.9%) | 74 (1.0%)     | 3046 (40.2%)  | 4451 (58.8%)  | 238 (2.9%)    | 3558 (43.0%)  | 4484 (54.2%) |
| Duration of surgery (mins) | 121 (66)   | 107 (79.6)   | 137 (78.8)   | 143.6 (113) | 118.1 (87.8) | 152.7 (92.3) | 158.2 (120.7) | 129.2 (103.1) | 156.6 (100.7) | 190.9 (102.6) | 133.8 (112.7) | 152.4 (99.3) |
